# Supplementary material for: Tracking the Origin and Early Evolution of Reptiles
Source: Frontiers journal article supplement (doi:10.3389/fevo.2021.696511), 2021-07-01
Supplement: Table_2.xlsx [file Table_2.xlsx]

## Sheet: Tabelle1
																		with normalized lengths															Angles in radiant
Specimen	Taxon	SLp	PLp	PAp	LPp	WPp	DIVp	SLm	PLm	PAm	LPm	WPm	DIVm	Dmp	BL	FL		Taxon_sample	Sp/pL	Gp/pL	Gm/pL	(Gp-Gm)/pL	Pp/pL	Pm/pL	GAD/pL	Dpm/pL	Pap	Pam	Pam-Pap	Oap	Oam	Oam-Oap	Pap	Pam	Pam-Pap	Oap	Oam	Oam-Oap
MCZ 267	Hylopus		205.1		187.3	82.3	-15.81		232.2		193.7	128	1.955	37.9		102.1		Hylopus_Mississippian		0.806072	1.25367	-0.4476	2.00881	2.27424		0.371205				-15.81	1.955	17.765				-0.275937	0.0341212	0.310058
NMMNH P-64276	Hylopus	233.5	151.6	100.103	117.6	93.625	-12.78	237.033	145.625	107.963	119.125	82.65	9.39	46.12	167.333	52.9		Hylopus_Mississippian	4.41399	1.76985	1.56238	0.207467	2.86578	2.75284	3.1632	0.871834	100.103	107.963	7.86	-12.78	9.39	22.17	1.74713	1.88432	0.137183	-0.223053	0.163886	0.386939
ANSP 22651	Hylopus	106.3	73.4	108.61	59.75	42.65	-15.0333	105.5	66.3	127.41	58.95	29.3	28.38	25.925	63.8	24.6		Hylopus_Mississippian	4.32114	1.73374	1.19106	0.542683	2.98374	2.69512	2.5935	1.05386	108.61	127.41	18.8	-15.0333	28.38	43.4133	1.8956	2.22372	0.328122	-0.262381	0.495324	0.757706
NMMNH P-64282	Hylopus	113.15	74.1	109.41	60.05	42.9	-2.24667	109.1	63.45	121.96	55.3	30.55	4.35333	22.575	83.6	30.2		Hylopus_Mississippian	3.74669	1.42053	1.01159	0.40894	2.45364	2.10099	2.76821	0.747517	109.41	121.96	12.55	-2.24667	4.35333	6.6	1.90956	2.1286	0.219039	-0.0392117	0.07598	0.115192
NMMNH P-64311	Hylopus	139.933	92.425	97.1833	70.625	57.475	-7.46	142.033	96.95	93.21	72.275	61.275	16.88	27.66	101.767	41.4		Hylopus_Mississippian	3.38003	1.38829	1.48007	-0.0917874	2.23249	2.34179	2.45813	0.668116	97.1833	93.21	-3.97333	-7.46	16.88	24.34	1.69617	1.62682	-0.0693477	-0.130202	0.294612	0.424813
VP & SU 77.1	Hylopus	176.2	114.5	99.72	87.9	73.2	-16.16	174.1	96.55	127.56	86.2	43.2	32.45	39.3	114.9	46.2		Hylopus_Mississippian	3.81385	1.58442	0.935065	0.649351	2.47835	2.08983	2.48701	0.850649	99.72	127.56	27.84	-16.16	32.45	48.61	1.74044	2.22634	0.4859	-0.282045	0.566359	0.848405
YPM-PU 18828	Hylopus	192.2	111.8	118.53	95.9	56.6	-9.99333	183.2	108.2	115.56	91.65	56.8	11.68	16.3333	106.3	44.7		Hylopus_Mississippian	4.29978	1.26622	1.27069	-0.00447427	2.50112	2.42058	2.37808	0.365399	118.53	115.56	-2.97	-9.99333	11.68	21.6733	2.06874	2.0169	-0.0518363	-0.174417	0.203854	0.378271
NBMG 3060	Hylopus	140.067	89	105.99	71.925	51.775	1.302	142.033	94.325	100.207	74.25	57.475	10.515	26.78	101.733	38.8		Hylopus_Bashkirian	3.60997	1.33441	1.48131	-0.146907	2.29381	2.43106	2.62199	0.690206	105.99	100.207	-5.78333	1.302	10.515	9.213	1.84987	1.74894	-0.100938	0.0227242	0.183521	0.160797
NBMG 14143	Hylopus	168.05	154.08	66.18	85.06	127.8	-32.1625	174.7	140.44	76.59	87.04	109.46	-13.66	71.0667	159.075	58		Hylopus_Bashkirian	2.89741	2.20345	1.88724	0.316207	2.65655	2.42138	2.74267	1.22529	66.18	76.59	10.41	-32.1625	-13.66	18.5025	1.15506	1.33675	0.181689	-0.561342	-0.238412	0.32293
NSM 010GF045.051	Hylopus	149.2	122.25	74.7333	73.175	97.475	-7.77	152.133	92.75	110.56	76.575	51.9	23.035	50.54	129.833	40.3		Hylopus_Bashkirian	3.70223	2.41873	1.28784	1.13089	3.0335	2.30149	3.22167	1.25409	74.7333	110.56	35.8267	-7.77	23.035	30.805	1.30434	1.92964	0.625293	-0.135612	0.402037	0.537649
NSM 008GF039.039	Hylopus	146.5	125.85	70.71	73.15	102.25	-39.08	132.8	103.3	80.13	66.65	79.35	-19.44	48.5333	117.3	48.3		Hylopus_Bashkirian	3.03313	2.11698	1.64286	0.47412	2.60559	2.13872	2.42857	1.00483	70.71	80.13	9.42	-39.08	-19.44	19.64	1.23412	1.39853	0.16441	-0.682075	-0.339292	0.342783
RPM B13	Hylopus	138.65	85.4667	106.185	68.4333	51.2333	-11.405	123.85	80.5667	101.625	62.9	49.2	13.0375	33.125	100	35.8		Hylopus_Bashkirian	3.87291	1.4311	1.3743	0.056797	2.38734	2.25047	2.7933	0.925279	106.185	101.625	-4.56	-11.405	13.0375	24.4425	1.85328	1.77369	-0.079587	-0.199055	0.227547	0.426602
RPM H26	Hylopus	181.2	124.95	93.81	90.5	83.25	-7.275	165.3	110.2	96.86	82.7	72.1	10.115	17.4	104.6	41.3		Hylopus_Bashkirian	4.38741	2.01574	1.74576	0.269976	3.02542	2.66828	2.53269	0.421308	93.81	96.86	3.05	-7.275	10.115	17.39	1.63729	1.69053	0.0532325	-0.126973	0.17654	0.303513
SMP-IP 8789	Hylopus	151.525	120.75	83.56	80.25	89.45	-6.35167	158.7	110.667	92.085	81.1667	73.7	8.584	46.12	138.1	54.7		Hylopus_Bashkirian	2.77011	1.63528	1.34735	0.287934	2.2075	2.02316	2.52468	0.843144	83.56	92.085	8.525	-6.35167	8.584	14.9357	1.4584	1.60719	0.148789	-0.110857	0.149819	0.260677
SGM SA	Hylopus	374.8	206	130.92	187.4	85.7	9.42333	331.65	207.533	102.54	159.7	130.833	-18.7	145.5	342.4	106.7		Hylopus_Moscovian	3.51265	0.803187	1.22618	-0.422993	1.93065	1.94502	3.209	1.36364	130.92	102.54	-28.38	9.42333	-18.7	-28.1233	2.28499	1.78966	-0.495324	0.164468	-0.326377	-0.490845
KGS 1381	Notalacerta	102.382	90.1083	68.9445	51.2	73.1917	-18.792	100.173	68.9083	93.1845	49.4917	47.35	-0.356	24.8	74.9	38.1		Notalacerta_Bashkirian	2.68719	1.92104	1.24278	0.678259	2.36505	1.80862	1.96588	0.650919	68.9445	93.1845	24.24	-18.792	-0.356	18.436	1.20331	1.62638	0.423068	-0.327982	-0.00621337	0.321769
UGKU 1914	Notalacerta	62.92	49.9833	78.116	32.2667	37.3667	-44.105	61.54	44.1667	88.902	31.7333	29.8	-2.732	14.2286	49.44	18.8		Notalacerta_Bashkirian	3.34681	1.98759	1.58511	0.402482	2.65869	2.34929	2.62979	0.756839	78.116	88.902	10.786	-44.105	-2.732	41.373	1.36338	1.55163	0.188251	-0.769777	-0.0476824	0.722095
JL-NN 1 1	Notalacerta	66.44	52.3636	77.926	31.3636	40.8727	-10.47	65.9727	43.4167	100.803	32.2833	27.9833	16.996	14.1667	44.0778	19.9		Notalacerta_Bashkirian	3.33869	2.05391	1.4062	0.647708	2.63134	2.18174	2.21496	0.711893	77.926	100.803	22.8767	-10.47	16.996	27.466	1.36007	1.75934	0.399274	-0.182736	0.296636	0.479372
JL-NN 1 2	Notalacerta	58.075	48.24	76.62	30.18	37.78	-18.76	63.36	42.1833	98.202	31.3833	27.5667	10.2283	14.15	43.275	21.5		Notalacerta_Bashkirian	2.70116	1.75721	1.28217	0.475039	2.24372	1.96202	2.01279	0.65814	76.62	98.202	21.582	-18.76	10.2283	28.9883	1.33727	1.71395	0.376677	-0.327424	0.178518	0.505942
JL-NN 1 3	Notalacerta	53.15	43.3667	79.18	32	25.9	-8.325	45.75	33.4667	93.79	27.4667	17.3667	23.02	14.025	39.65	20.9		Notalacerta_Bashkirian	2.54306	1.23923	0.830941	0.408293	2.07496	1.60128	1.89713	0.671053	79.18	93.79	14.61	-8.325	23.02	31.345	1.38195	1.63694	0.254993	-0.145299	0.401775	0.547073
NSM 008GF031.068	Notalacerta	75.75	66.9333	70.725	41.0333	51.7667	-13.15	85.7667	58.025	97.75	44.2	36.975	11.654	28.8	71.45	30		Notalacerta_Bashkirian	2.525	1.72556	1.2325	0.493056	2.23111	1.93417	2.38167	0.96	70.725	97.75	27.025	-13.15	11.654	24.804	1.23438	1.70606	0.471675	-0.229511	0.203401	0.432911
NMMNH P 31705	Notalacerta	74.8	51.7	91.9567	36.675	37.15	1.606	74	53.6	83.97	35.8	39.8	3.92	18.9	55.5	20.2		Notalacerta_McAlester	3.70297	1.83911	1.9703	-0.131188	2.55941	2.65347	2.74752	0.935644	91.9567	83.97	-7.98667	1.606	3.92	2.314	1.60495	1.46555	-0.139394	0.02803	0.0684169	0.0403869
NMMNH P 31746	Notalacerta	69.15	42.54	107.825	34.32	24.84	7.80333	73.96	46.2667	104.302	36.45	28.2333	11.1371	20.18	56.6	17.6		Notalacerta_McAlester	3.92898	1.41136	1.60417	-0.192803	2.41705	2.62879	3.21591	1.14659	107.825	104.302	-3.523	7.80333	11.1371	3.33381	1.8819	1.82041	-0.0614879	0.136194	0.19438	0.058186
NMMNH P 31749	Notalacerta	63.35	47.3333	92.6	33.3333	33.1667	-8.4	58.18	40.3	90.485	28.3	28.6167	4.335	17	50.7	17.9		Notalacerta_McAlester	3.53911	1.85289	1.5987	0.25419	2.64432	2.2514	2.8324	0.949721	92.6	90.485	-2.115	-8.4	4.335	12.735	1.61617	1.57926	-0.0369137	-0.146608	0.07566	0.222268
NMMNH P-31751-2	Notalacerta	63.9143	41.0429	102.153	31.7857	25.7714	-0.736667	64.025	41.625	96.79	30.9	27.75	6.37143	16.3167	48	14.8		Notalacerta_McAlester	4.31853	1.74131	1.875	-0.133687	2.77317	2.8125	3.24324	1.10248	102.153	96.79	-5.36333	-0.736667	6.37143	7.1081	1.78291	1.6893	-0.0936078	-0.0128573	0.111202	0.12406
NMMNH P-31759	Notalacerta	67.1167	43.2	102.557	33.7286	26.8	4.20571	66.06	44.25	98.144	33.65	28.7333	7.985	23.3714	56.68	16.2		Notalacerta_McAlester	4.143	1.65432	1.77366	-0.119342	2.66667	2.73148	3.49877	1.44268	102.557	98.144	-4.41267	4.20571	7.985	3.77929	1.78995	1.71294	-0.0770156	0.0734036	0.139365	0.065961
NSM 009 GF 012	Dromopus	189.5	123.65	99.57	94.55	78.95	-20.4167	181.5	124.7	98.3	97.3333	76.9333	-1.3725	32.8	112.6	43.8		Dromopus_Gzhelian	4.32648	1.80251	1.75647	0.0460426	2.82306	2.84703	2.57078	0.748858	99.57	98.3	-1.27	-20.4167	-1.3725	19.0442	1.73782	1.71566	-0.0221657	-0.356338	-0.0239546	0.332383
YPM 519	Dromopus	315.3	193.1	107.85	156.36	113.14	-7.29857	314.633	190.1	108.287	152.72	112.4	4.26	46.2714	216.667	75.2		Dromopus_Gzhelian	4.19282	1.50452	1.49468	0.00984043	2.56782	2.52793	2.88121	0.615312	107.85	108.287	0.436667	-7.29857	4.26	11.5586	1.88234	1.88996	0.00762127	-0.127384	0.074351	0.201735
NSM 997 GF 30.6	Varanopus	106.7	79.15	84.0033	52.35	58.975	4.272	97.2667	80.475	74.3067	48.25	63.7	17.442	29.825	80.6	24.9		Varanopus_Gzhelian	4.28514	2.36847	2.55823	-0.189759	3.17871	3.23193	3.23695	1.19779	84.0033	74.3067	-9.69667	4.272	17.442	13.17	1.46613	1.2969	-0.169239	0.0745605	0.30442	0.22986
NSM 99 GF 34b	Varanopus	130.838	93.1333	90.2687	67.0889	63.5778	3.97875	133.438	86.2333	102.775	67.5	50.2	5.095	37.93	109.025	36.3		Varanopus_Gzhelian	3.60434	1.75145	1.38292	0.368534	2.56566	2.37557	3.00344	1.0449	90.2687	102.775	12.5062	3.97875	5.095	1.11625	1.57549	1.79376	0.218275	0.0694423	0.0889245	0.0194822
Thuringian Forest reference sample:
JF-1	Dromopus lacertoides	91.7	61.5	96.7		41.8	-20	90.5	59.6	103.3		36	25.8	11.8	57	25		Dromopus_Cis	3.668	1.672	1.44	0.232	2.46	2.384	2.28	0.472	96.7	103.3	6.6	-20	25.8	45.8	1.68773	1.80293	0.115192	-0.349066	0.450295	0.799361
JF-31	Dromopus lacertoides	162	103.7	98		68	0.8	158.3	115	135		78	27.4	45.3	124	44.3		Dromopus_Cis	3.65688	1.53499	1.76072	-0.225734	2.34086	2.59594	2.7991	1.02257	98	135	37	0.8	27.4	26.6	1.71042	2.35619	0.645772	0.0139626	0.47822	0.464258
MB.ICV.22	Dromopus lacertoides	235.5	151	107.5		89	2.5	238	137.3	123.5		66.7	18.3	27.8	143.5	55		Dromopus_Cis	4.28182	1.61818	1.21273	0.405455	2.74545	2.49636	2.60909	0.505455	107.5	123.5	16	2.5	18.3	15.8	1.87623	2.15548	0.279253	0.0436332	0.319395	0.275762
MNG-2005-F1	Dromopus lacertoides	70.5	60	76		46.8	-7	70	56.2	82		40	13.8	32	69.8	30		Dromopus_Cis	2.35	1.56	1.33333	0.226667	2	1.87333	2.32667	1.06667	76	82	6	-7	13.8	20.8	1.32645	1.43117	0.10472	-0.122173	0.240855	0.363028
MNG-2005-F2	Dromopus lacertoides	148	109.5	92		80.5	-5.3	155	107	102		72	-2.8	27.7	108	47		Dromopus_Cis	3.14894	1.71277	1.53191	0.180851	2.32979	2.2766	2.29787	0.589362	92	102	10	-5.3	-2.8	2.5	1.6057	1.78024	0.174533	-0.0925025	-0.0488692	0.0436332
MNG-13436	Dromopus lacertoides	112	96	72		78.5	-14.7	127	100	91		81	5.7	27.7	97	47.7		Dromopus_Cis	2.34801	1.6457	1.69811	-0.0524109	2.01258	2.09644	2.03354	0.580713	72	91	19	-14.7	5.7	20.4	1.25664	1.58825	0.331613	-0.256563	0.0994838	0.356047
MNG-13442-F1a	Dromopus lacertoides	67	48.5	118		32.5	-27.8	66.5	48.7	111.5		29.7	11.8	18.7	52.5	23		Dromopus_Cis	2.91304	1.41304	1.2913	0.121739	2.1087	2.11739	2.28261	0.813043	118	111.5	-6.5	-27.8	11.8	39.6	2.05949	1.94604	-0.113446	-0.485202	0.205949	0.69115
NHMS-AP-28-7 (= AF-9b)	Dromopus lacertoides	25.7	20	80		15	-28.6	24.3	22	66.7		18.5	-7.6	6.6	18	8		Dromopus_Cis	3.2125	1.875	2.3125	-0.4375	2.5	2.75	2.25	0.825	80	66.7	-13.3	-28.6	-7.6	21	1.39626	1.16413	-0.232129	-0.499164	-0.132645	0.366519
VF-1	Dromopus lacertoides	104.5	76.3	96		55.7	-0.8	105	66.8	102.7		42.5	14.6	15.5	69.5	31		Dromopus_Cis	3.37097	1.79677	1.37097	0.425806	2.46129	2.15484	2.24194	0.5	96	102.7	6.7	-0.8	14.6	15.4	1.67552	1.79245	0.116937	-0.0139626	0.254818	0.268781
VF-2010	Dromopus lacertoides	208	133.5	105		82.5	-14.3	228	139	110		79.3	7	34	141	58.5		Dromopus_Cis	3.55556	1.41026	1.35556	0.0547009	2.28205	2.37607	2.41026	0.581197	105	110	5	-14.3	7	21.3	1.8326	1.91986	0.0872665	-0.249582	0.122173	0.371755
VF-2051-F1	Dromopus lacertoides	192.7	113	111		66	-9.4	182.3	111.5	106		68.3	14.6	22.2	117.7	46		Dromopus_Cis	4.18913	1.43478	1.48478	-0.05	2.45652	2.42391	2.5587	0.482609	111	106	-5	-9.4	14.6	24	1.93732	1.85005	-0.0872665	-0.164061	0.254818	0.418879
VF-4489	Dromopus lacertoides	48	30.5	104		19.5	-8	48.5	30	114		16	-6.5	5.3	31	13		Dromopus_Cis	3.69231	1.5	1.23077	0.269231	2.34615	2.30769	2.38462	0.407692	104	114	10	-8	-6.5	1.5	1.81514	1.98968	0.174533	-0.139626	-0.113446	0.0261799
MNG-1841	Varanopus microdactylus	122.5	95	90.5		71.7	-1	117.5	90.7	90.5		65.7	9.7	38.8	101.5	30		Varanopus_Cis	4.08333	2.39	2.19	0.2	3.16667	3.02333	3.38333	1.29333	90.5	90.5	0	-1	9.7	10.7	1.57952	1.57952	0	-0.0174533	0.169297	0.18675
MNG-2052	Varanopus microdactylus	120.5	78.3	99.3		50.4	-0.5	119.9	70.4	115.5		37.2	13.1	25.5	85	27.3		Varanopus_Cis	4.41392	1.84615	1.36264	0.483516	2.86813	2.57875	3.11355	0.934066	99.3	115.5	16.2	-0.5	13.1	13.6	1.73311	2.01586	0.282743	-0.00872665	0.228638	0.237365
MNG-10083	Varanopus microdactylus	99.6	72	88		49	-11.7	98.1	68.9	92.6		44.6	8.7	28.8	77.6	21		Varanopus_Cis	4.74286	2.33333	2.12381	0.209524	3.42857	3.28095	3.69524	1.37143	88	92.6	4.6	-11.7	8.7	20.4	1.53589	1.61617	0.0802851	-0.204204	0.151844	0.356047
PMJ-P-1322 (= JP-1)	Varanopus microdactylus	89.4	72.4	74.1		57.8	13	92.7	72	81.3		52.6	8.8	29.5	74.5	25		Varanopus_Cis	3.576	2.312	2.104	0.208	2.896	2.88	2.98	1.18	74.1	81.3	7.2	13	8.8	-4.2	1.29329	1.41895	0.125664	0.226893	0.153589	-0.0733038
SFM-7	Varanopus microdactylus	185	104	124		47.5	-12.3	190	110	120		54.5	-10	17.7	109	29		Varanopus_Cis	6.37931	1.63793	1.87931	-0.241379	3.58621	3.7931	3.75862	0.610345	124	120	-4	-12.3	-10	2.3	2.16421	2.0944	-0.0698132	-0.214675	-0.174533	0.0401426
